# Supplementary material for: SARS-CoV-2 post-acute sequelae in previously hospitalised patients: systematic literature review and meta-analysis
Source: PubMed Central journal article supplement — Eur Respir Rev. 2023 Jul 12;32(169):220254. doi: 10.1183/16000617.0254-2022 (PMC10336551; doi:10.1183/16000617.0254-2022), 2023-07-12
Supplement: ERR-0254-2022.SUPPLEMENT.pdf [file ERR-0254-2022.SUPPLEMENT.pdf]

## **SARS-CoV-2 post-acute sequelae in previously hospitalised patients: SLR and meta-analysis**

**Authors:** Kelly, J. D.,<sup>1</sup> Curteis, T.,<sup>2</sup> Rawal, A.,<sup>3</sup> Murton, M.,<sup>4</sup> Clark, L. J.,<sup>2</sup> Jafry, Z.,<sup>3</sup> Shah-Gupta, R.,<sup>5</sup> Berry, M.,<sup>5</sup> Espinueva, A.,<sup>6\*</sup> Chen, L.,<sup>6</sup> Abdelghany, M.,<sup>6</sup> Sweeney, D. A.,<sup>7</sup> Quint, J. K.<sup>8</sup>

<sup>1</sup> Department of Epidemiology and Biostatistics, University of California, San Francisco, CA, USA. <sup>2</sup> Costello Medical Consulting Ltd, Manchester, UK. <sup>3</sup> Costello Medical Consulting Inc, Boston, MA, USA. <sup>4</sup> Costello Medical Consulting Ltd, London, UK. <sup>5</sup> Gilead Sciences Europe Ltd, Uxbridge, UK. <sup>6</sup> Gilead Sciences, Inc, Foster City, CA, USA. <sup>7</sup> Division of Pulmonary, Critical Care and Sleep Medicine, Department of Medicine, University of California, San Diego, CA, USA. <sup>8</sup> Imperial College London, London, UK.

\*At time of study

## **SUPPLEMENTARY APPENDIX**

**SUPPLEMENTARY TABLES AND FIGURES****Table S1. All symptoms extracted from the 52 studies identified by the SLR**

| Category                                       | Symptom                | Number of Reporting Studies | Reported Frequency Range (Minimum, Maximum) | Prioritised for Meta-Analysis |
|------------------------------------------------|------------------------|-----------------------------|---------------------------------------------|-------------------------------|
| Percentage of patients with at least 1 symptom |                        | 21                          | (0, 92.8)                                   | Y                             |
| General/systemic                               | Fatigue                | 38                          | (0, 78.9)                                   | Y                             |
|                                                | Fever                  | 12                          | (0, 7.5)                                    | N                             |
|                                                | Dizziness              | 11                          | (0.1, 48.4)                                 | N                             |
|                                                | Weakness/asthenia      | 7                           | (0, 67.0)                                   | N                             |
|                                                | Sweat                  | 6                           | (0, 36.2)                                   | N                             |
|                                                | Malaise                | 2                           | (4.3, 18.7)                                 | N                             |
|                                                | Pain                   | 2                           | (19, 36.8)                                  | N                             |
|                                                | Shivering              | 2                           | (0.1, 0.5)                                  | N                             |
| Cardiopulmonary                                | Dyspnea/breathlessness | 42                          | (0, 77.7)                                   | Y                             |
|                                                | Cough                  | 34                          | (0, 61.3)                                   | Y                             |
|                                                | Chest pain             | 24                          | (0, 31.5)                                   | Y                             |
|                                                | Palpitations           | 11                          | (0.3, 25.5)                                 | N                             |
|                                                | Sputum                 | 10                          | (0, 44.3)                                   | N                             |
|                                                | Pedal edema            | 7                           | (0.2, 28.3)                                 | N                             |
|                                                | General                | 4                           | (2.6, 56.0)                                 | N                             |

| Category              | Symptom                   | Number of Reporting Studies | Reported Frequency Range (Minimum, Maximum) | Prioritised for Meta-Analysis |
|-----------------------|---------------------------|-----------------------------|---------------------------------------------|-------------------------------|
|                       | Syncope                   | 4                           | (0.1, 2.3)                                  | N                             |
|                       | Hypertension              | 2                           | (0.4, 1.3)                                  | N                             |
|                       | Flushing                  | 1                           | (4.8, 4.8)                                  | N                             |
|                       | Tachycardia               | 1                           | (35.4, 40.8)                                | N                             |
| Upper respiratory/ENT | Sore throat               | 7                           | (0, 7.2)                                    | N                             |
|                       | Swallowing difficulties   | 5                           | (0, 13.3)                                   | N                             |
|                       | General                   | 3                           | (1.1, 37)                                   | N                             |
|                       | Dysarthria                | 3                           | (1.6, 16.7)                                 | N                             |
|                       | Nasal congestion/rhinitis | 2                           | (0, 12.7)                                   | N                             |
|                       | Rhinorrhea/runny nose     | 2                           | (0, 10.9)                                   | N                             |
|                       | Laryngeal sensitivity     | 1                           | (16.0, 16.0)                                | N                             |
|                       | Dry mouth                 | 1                           | (24.0, 24.0)                                | N                             |
|                       | Sneezing                  | 1                           | (0.5, 0.5)                                  | N                             |
| Gastrointestinal      | Diarrhea                  | 19                          | (0, 17.0)                                   | Y                             |
|                       | General                   | 9                           | (1.6, 44.7)                                 | N                             |
|                       | Loss of appetite          | 9                           | (0.2, 26.9)                                 | N                             |
|                       | Stomach/abdominal pain    | 6                           | (0, 15.4)                                   | N                             |
|                       | Nausea                    | 5                           | (0.1, 18.0)                                 | N                             |
|                       | Weight loss               | 6                           | (0.2, 37.7)                                 | N                             |

| Category                                     | Symptom                             | Number of Reporting Studies | Reported Frequency Range (Minimum, Maximum) | Prioritised for Meta-Analysis |
|----------------------------------------------|-------------------------------------|-----------------------------|---------------------------------------------|-------------------------------|
|                                              | Vomiting                            | 5                           | (0, 9.0)                                    | N                             |
|                                              | Constipation                        | 4                           | (0.2, 36.9)                                 | N                             |
|                                              | Bloody stool                        | 1                           | (2.0, 2.0)                                  | N                             |
|                                              | Ulcer                               | 1                           | (20.0, 20.0)                                | N                             |
|                                              | Bowel control problem               | 1                           | (3.0, 3.0)                                  | N                             |
|                                              | Cramps                              | 1                           | (15.0, 17.7)                                | N                             |
|                                              | Acid reflux                         | 1                           | (18.0, 18.0)                                | N                             |
|                                              | Belching                            | 1                           | (10.0, 10.0)                                | N                             |
|                                              | Abdominal distension                | 1                           | (14.0, 14.0)                                | N                             |
| Neurological/<br>neuromuscular/<br>cognitive | Smell disturbance/anosmia           | 29                          | (0, 44.6)                                   | Y                             |
|                                              | Taste disturbance/dysgeusia/ageusia | 25                          | (0, 42.0)                                   | Y                             |
|                                              | Combined anosmia and ageusia        | 7                           | (0, 28.8)                                   | Y                             |
|                                              | Headache                            | 21                          | (0, 39.0)                                   | Y                             |
|                                              | Insomnia/sleep disorder             | 17                          | (0.5, 76)                                   | N                             |
|                                              | Memory loss/impairment              | 16                          | (0, 53.8)                                   | N                             |
|                                              | Inability to concentrate            | 12                          | (7.1, 40.7)                                 | N                             |
|                                              | Tingling/numbness/paresthesia       | 10                          | (0, 46.9)                                   | N                             |
|                                              | Abnormal walking/gait               | 5                           | (2.7, 35.6)                                 | N                             |
|                                              | Tremors                             | 5                           | (0.1, 13.9)                                 | N                             |

| Category                      | Symptom                         | Number of Reporting Studies | Reported Frequency Range (Minimum, Maximum) | Prioritised for Meta-Analysis |
|-------------------------------|---------------------------------|-----------------------------|---------------------------------------------|-------------------------------|
|                               | General                         | 4                           | (15.0, 61.0)                                | N                             |
|                               | Confusion                       | 3                           | (0.1, 43.2)                                 | N                             |
|                               | Facial palsy and asymmetry      | 3                           | (0, 5.9)                                    | N                             |
|                               | Reduced sensation/sensibility   | 3                           | (7.5, 26.0)                                 | N                             |
|                               | Seizures                        | 2                           | (0.1, 1.1)                                  | N                             |
| Musculoskeletal               | Muscle pain/myalgia             | 22                          | (0, 57.2)                                   | Y                             |
|                               | Joint pain/arthralgia           | 12                          | (0, 54.7)                                   | Y                             |
|                               | Combined arthralgia and myalgia | 4                           | (12.6, 51.0)                                | Y                             |
|                               | Impaired or altered mobility    | 8                           | (0, 53.1)                                   | N                             |
|                               | General                         | 2                           | (38.5, 40.4)                                | N                             |
|                               | Myoclonus/muscle jerks          | 2                           | (0, 0.4)                                    | N                             |
|                               | Masticatory muscle weakness     | 2                           | (0, 3.8)                                    | N                             |
|                               | Arthritis                       | 1                           | (26.1, 26.1)                                | N                             |
|                               | Abnormal muscle tone            | 1                           | (5.5, 5.5)                                  | N                             |
| Skin/ integumentary           | Alopecia/hair loss              | 9                           | (0.2, 28.6)                                 | N                             |
|                               | Cutaneous manifestation/rash    | 8                           | (0.2, 16.0)                                 | N                             |
| Reproductive/ sexual function | Urinary dysfunction             | 5                           | (0.1, 13.8)                                 | N                             |
|                               | Sexual dysfunction              | 2                           | (13.8, 21.5)                                | N                             |
|                               | Changes in menstruation         | 1                           | (0.2, 0.2)                                  | N                             |

| Category           | Symptom                                                                                                                                           | Number of Reporting Studies | Reported Frequency Range (Minimum, Maximum) | Prioritised for Meta-Analysis |
|--------------------|---------------------------------------------------------------------------------------------------------------------------------------------------|-----------------------------|---------------------------------------------|-------------------------------|
| Vision/hearing     | Visual disturbance                                                                                                                                | 7                           | (0.4, 38.5)                                 | N                             |
|                    | General                                                                                                                                           | 4                           | (3.0, 7.1)                                  | N                             |
|                    | Difficulty hearing                                                                                                                                | 2                           | (0.2, 7.0)                                  | N                             |
|                    | Eye irritation                                                                                                                                    | 1                           | (42.9, 42.9)                                | N                             |
|                    | Tinnitus                                                                                                                                          | 1                           | (3.1, 4.4)                                  | N                             |
|                    | Otalgia                                                                                                                                           | 1                           | (0.5, 0.5)                                  | N                             |
| Composite symptoms | Other systemic symptoms: dizziness; weakness/asthenia                                                                                             | 16                          | (0.1, 9.7)                                  | N                             |
|                    | Other cardiopulmonary symptoms: palpitations; syncope; tachycardia                                                                                | 12                          | (0.1, 9.5)                                  | N                             |
|                    | Other neurological symptoms: insomnia/sleep disorder; memory loss/impairment; inability to concentrate; tingling/numbness/paraesthesia; confusion | 29                          | (0.1, 9.5)                                  | N                             |

**Footnote:** Ranges of symptom frequency provide an indication as to the extent of variation in the percentage of patients experiencing each symptom.

**Table S2. Search terms used in MEDLINE (searched via the OvidSP platform)**

| Date searched: 16 Nov.,2021<br>Records retrieved: 1,461 |   |                                                 |                       |
|---------------------------------------------------------|---|-------------------------------------------------|-----------------------|
| Term group                                              | # | Search terms                                    | Results 16 Nov., 2021 |
| Disease Area: Long COVID-19                             | 1 | exp coronavirus/ or exp coronavirus infections/ | 46596                 |
|                                                         | 2 | SARS-CoV-2.ti,ab,kf.                            | 64255                 |
|                                                         | 3 | (coronavirus\$ or corona virus\$).ti,ab,kf.     | 86116                 |

| Date searched: 16 Nov.,2021<br>Records retrieved: 1,461 |    |                                                                                                                                                                                                                                                                                                                                                                |                       |
|---------------------------------------------------------|----|----------------------------------------------------------------------------------------------------------------------------------------------------------------------------------------------------------------------------------------------------------------------------------------------------------------------------------------------------------------|-----------------------|
| Term group                                              | #  | Search terms                                                                                                                                                                                                                                                                                                                                                   | Results 16 Nov., 2021 |
|                                                         | 4  | (Covid-19 or Covid19).ti,ab,kf.                                                                                                                                                                                                                                                                                                                                | 173614                |
|                                                         | 5  | nCoV.ti,ab,kf.                                                                                                                                                                                                                                                                                                                                                 | 2385                  |
|                                                         | 6  | or/1-5                                                                                                                                                                                                                                                                                                                                                         | 207013                |
|                                                         | 7  | (long-term or long-haul or post-acute or long-COVID or post-COVID or chronic-COVID).ti,ab,kf.                                                                                                                                                                                                                                                                  | 885659                |
|                                                         | 8  | 6 and 7                                                                                                                                                                                                                                                                                                                                                        | 8675                  |
|                                                         | 9  | ((long or longer or hauler\$ or post or persistent or persistence or prolong\$ or extend\$ or protract\$ or sequelae or chronic) adj2 (SARSCOV2 or SAR-CoV2 or COVID or COVID19 or COVID-19 or "Sars Covid" or 2019ncov or 19ncov or ncov or n-cov or coronavirus or SARS-CoV-2 or sarscov2 or sarsCov-2 or sars-cov2 or "novel Cov" or "wuhan virus")).ti,ab. | 4201                  |
|                                                         | 10 | 8 or 9                                                                                                                                                                                                                                                                                                                                                         | 10030                 |
| Study Design: RCTs and Clinical Trials                  | 11 | randomized controlled trials as topic/                                                                                                                                                                                                                                                                                                                         | 150175                |
|                                                         | 12 | randomized controlled trial/                                                                                                                                                                                                                                                                                                                                   | 550319                |
|                                                         | 13 | random allocation/                                                                                                                                                                                                                                                                                                                                             | 106182                |
|                                                         | 14 | double blind method/                                                                                                                                                                                                                                                                                                                                           | 168318                |
|                                                         | 15 | single blind method/                                                                                                                                                                                                                                                                                                                                           | 31185                 |
|                                                         | 16 | Placebos/                                                                                                                                                                                                                                                                                                                                                      | 35764                 |
|                                                         | 17 | exp Clinical Trials as Topic/                                                                                                                                                                                                                                                                                                                                  | 366447                |
|                                                         | 18 | Clinical Trial/                                                                                                                                                                                                                                                                                                                                                | 532273                |
|                                                         | 19 | Clinical Trial, Phase II/ or Clinical Trial, Phase III/ or Clinical Trial, Phase IV/                                                                                                                                                                                                                                                                           | 56446                 |
|                                                         | 20 | Controlled Clinical Trial/ or Adaptive Clinical Trial/                                                                                                                                                                                                                                                                                                         | 94572                 |
|                                                         | 21 | randomized controlled trial.pt.                                                                                                                                                                                                                                                                                                                                | 550319                |

| Date searched: 16 Nov.,2021<br>Records retrieved: 1,461 |                       |                                                                                         |                        |
|---------------------------------------------------------|-----------------------|-----------------------------------------------------------------------------------------|------------------------|
| Term group                                              | #                     | Search terms                                                                            | Results 16 Nov., 2021  |
|                                                         | 22                    | clinical trial.pt.                                                                      | 532273                 |
|                                                         | 23                    | (clinical trial, phase ii or clinical trial, phase iii or clinical trial, phase iv).pt. | 56446                  |
|                                                         | 24                    | (controlled clinical trial or multicenter study).pt.                                    | 399110                 |
|                                                         | 25                    | (clinical adj trial\$).ti,ab,kf.                                                        | 427313                 |
|                                                         | 26                    | ((singl\$ or doubl\$ or treb\$ or tripl\$) adj (blind\$3 or mask\$3)).ti,ab,kf.         | 184351                 |
|                                                         | 27                    | placebo\$.ti,ab,kf.                                                                     | 231288                 |
|                                                         | 28                    | (allocat\$ adj2 random\$).ti,ab,kf.                                                     | 39059                  |
|                                                         | 29                    | Randomi?ed adj2 trial\$.ti,ab,kf.                                                       | 369805                 |
|                                                         | 30                    | rct.ti,ab,kf.                                                                           | 27854                  |
|                                                         | 31                    | or/11-30                                                                                | 1870024                |
|                                                         | Observational Studies | 32                                                                                      | Epidemiologic Studies/ |
| 33                                                      |                       | Observational Study/                                                                    | 114118                 |
| 34                                                      |                       | Cohort Studies/                                                                         | 298712                 |
| 35                                                      |                       | exp Case-Control Studies/                                                               | 1249513                |
| 36                                                      |                       | Cross-Sectional Studies/                                                                | 398257                 |
| 37                                                      |                       | Clinical Study/                                                                         | 4293                   |
| 38                                                      |                       | Follow-Up Studies/                                                                      | 675244                 |
| 39                                                      |                       | Longitudinal Studies/                                                                   | 152284                 |
| 40                                                      |                       | Retrospective Studies/                                                                  | 964740                 |
| 41                                                      |                       | Prospective Studies/ not Randomised Controlled Trials as Topic/                         | 596526                 |



| Date searched: 16 Nov.,2021<br>Records retrieved: 1,461 |    |                                                                      |                       |
|---------------------------------------------------------|----|----------------------------------------------------------------------|-----------------------|
| Term group                                              | #  | Search terms                                                         | Results 16 Nov., 2021 |
|                                                         | 42 | (observational adj (study or studies)).ti,ab,kf.                     | 131980                |
|                                                         | 43 | (cohort adj (study or studies)).ti,ab,kf.                            | 257418                |
|                                                         | 44 | cohort analy\$.ti,ab,kf.                                             | 10465                 |
|                                                         | 45 | case control.ti,ab,kf.                                               | 139609                |
|                                                         | 46 | cross sectional.ti,ab,kf.                                            | 423377                |
|                                                         | 47 | (follow up adj (study or studies)).ti,ab,kf.                         | 54091                 |
|                                                         | 48 | longitudinal.ti,ab,kf.                                               | 283228                |
|                                                         | 49 | retrospective.ti,ab,kf.                                              | 626726                |
|                                                         | 50 | (prospective adj (study or studies)).ti,ab,kf.                       | 191030                |
|                                                         | 51 | (epidemiologic\$ adj (study or studies)).ti,ab,kf.                   | 89760                 |
|                                                         | 52 | or/32-51                                                             | 3502808               |
| Standard exclusion filter                               | 53 | exp animals/ not exp humans/                                         | 4914943               |
|                                                         | 54 | (comment or editorial or "case reports" or "historical article").pt. | 3896432               |
|                                                         | 55 | (case stud\$ or case report\$).ti.                                   | 331874                |
|                                                         | 56 | historical article/                                                  | 366481                |
|                                                         | 57 | case reports/ or comment/ or editorial/                              | 3548986               |
|                                                         | 58 | or/53-57                                                             | 8800666               |
| Combination                                             | 59 | 10 and (31 or 52)                                                    | 2588                  |
|                                                         | 60 | 59 not 58                                                            | 2484                  |
|                                                         | 61 | limit 60 to yr="2019-current"                                        | 2470                  |

**Databases:** Ovid MEDLINE(R) and Epub Ahead of Print, In-Process, In-Data-Review & Other Non-Indexed Citations and Daily 1946 to 15 Nov., 2021.

**Abbreviations:** COVID-19, coronavirus 2019; RCT, randomised controlled/clinical trial.

**Table S3. Search terms used in Embase (searched via the OvidSP platform)**

| Date searched: 16 Nov., 2021                 |    |                                                                                                                                                                                                                                                                                                                                                                |                       |
|----------------------------------------------|----|----------------------------------------------------------------------------------------------------------------------------------------------------------------------------------------------------------------------------------------------------------------------------------------------------------------------------------------------------------------|-----------------------|
| Records retrieved: 587                       |    |                                                                                                                                                                                                                                                                                                                                                                |                       |
| Term group                                   | #  | Search terms                                                                                                                                                                                                                                                                                                                                                   | Results 16 Nov., 2021 |
| Disease Area: Long COVID-19                  | 1  | coronavirinae/ or coronavirus infection/                                                                                                                                                                                                                                                                                                                       | 15341                 |
|                                              | 2  | SARS-CoV-2.ti,ab,kf.                                                                                                                                                                                                                                                                                                                                           | 63732                 |
|                                              | 3  | (coronavirus\$ or corona virus\$).ti,ab,kf.                                                                                                                                                                                                                                                                                                                    | 84983                 |
|                                              | 4  | (Covid-19 or Covid19).ti,ab,kf.                                                                                                                                                                                                                                                                                                                                | 175512                |
|                                              | 5  | nCoV.ti,ab,kf.                                                                                                                                                                                                                                                                                                                                                 | 2394                  |
|                                              | 6  | or/1-5                                                                                                                                                                                                                                                                                                                                                         | 208442                |
|                                              | 7  | (long-term or long-haul or post-acute or long-COVID or post-COVID or chronic-COVID).ti,ab,kf.                                                                                                                                                                                                                                                                  | 1221393               |
|                                              | 8  | 6 and 7                                                                                                                                                                                                                                                                                                                                                        | 9166                  |
|                                              | 9  | ((long or longer or hauler\$ or post or persistent or persistence or prolong\$ or extend\$ or protract\$ or sequelae or chronic) adj2 (SARSCOV2 or SAR-CoV2 or COVID or COVID19 or COVID-19 or "Sars Covid" or 2019nCoV or 19ncov or nCoV or n-cov or coronavirus or SARS-CoV-2 or sarscov2 or sarsCov-2 or sars-cov2 or "novel Cov" or "wuhan virus")).ti,ab. | 4558                  |
|                                              | 10 | 8 or 9                                                                                                                                                                                                                                                                                                                                                         | 10688                 |
| Study Design: RCTs or interventional studies | 11 | "randomized controlled trial (topic)"/                                                                                                                                                                                                                                                                                                                         | 214585                |
|                                              | 12 | randomized controlled trial/                                                                                                                                                                                                                                                                                                                                   | 683614                |
|                                              | 13 | randomization/                                                                                                                                                                                                                                                                                                                                                 | 92195                 |
|                                              | 14 | double blind procedure/                                                                                                                                                                                                                                                                                                                                        | 189553                |
|                                              | 15 | single blind procedure/                                                                                                                                                                                                                                                                                                                                        | 44334                 |
|                                              | 16 | crossover procedure/                                                                                                                                                                                                                                                                                                                                           | 68676                 |

| Date searched: 16 Nov., 2021 |    |                                                                                 |                       |
|------------------------------|----|---------------------------------------------------------------------------------|-----------------------|
| Records retrieved: 587       |    |                                                                                 |                       |
| Term group                   | #  | Search terms                                                                    | Results 16 Nov., 2021 |
|                              | 17 | placebo/                                                                        | 373463                |
|                              | 18 | exp "clinical trial (topic)"/                                                   | 373392                |
|                              | 19 | clinical trial/                                                                 | 1019104               |
|                              | 20 | phase 2 clinical trial/ or phase 3 clinical trial/ or phase 4 clinical trial/   | 145208                |
|                              | 21 | controlled clinical trial/ or adaptive clinical trial/ or multicenter study/    | 708519                |
|                              | 22 | (clinical adj trial\$.ti,ab,kf.                                                 | 618520                |
|                              | 23 | ((singl\$ or doubl\$ or treb\$ or tripl\$) adj (blind\$3 or mask\$3)).ti,ab,kf. | 257244                |
|                              | 24 | placebo\$.ti,ab,kf.                                                             | 334814                |
|                              | 25 | (allocat\$ adj2 random\$).ti,ab,kf.                                             | 48298                 |
|                              | 26 | Randomi?ed adj2 trial\$.ti,ab,kf.                                               | 499475                |
|                              | 27 | rct.ti,ab,kf.                                                                   | 46607                 |
|                              | 28 | or/11-27                                                                        | 2608679               |
| Observational Studies        | 29 | epidemiology/                                                                   | 223752                |
|                              | 30 | observational study/                                                            | 252727                |
|                              | 31 | cohort analysis/                                                                | 774305                |
|                              | 32 | exp case control study/                                                         | 198237                |
|                              | 33 | cross-sectional study/                                                          | 445094                |
|                              | 34 | clinical study/                                                                 | 156642                |
|                              | 35 | follow up/                                                                      | 1762139               |
|                              | 36 | longitudinal study/                                                             | 163621                |
|                              | 37 | retrospective study/                                                            | 1160312               |

| Date searched: 16 Nov., 2021<br>Records retrieved: 587 |    |                                                                  |                       |
|--------------------------------------------------------|----|------------------------------------------------------------------|-----------------------|
| Term group                                             | #  | Search terms                                                     | Results 16 Nov., 2021 |
|                                                        | 38 | prospective study/ not "randomized controlled trial (topic)"/    | 717723                |
|                                                        | 39 | (observational adj (study or studies)).ti,ab,kf.                 | 205127                |
|                                                        | 40 | (cohort adj (study or studies)).ti,ab,kf.                        | 374155                |
|                                                        | 41 | cohort analy\$.ti,ab,kf.                                         | 15724                 |
|                                                        | 42 | case control.ti,ab,kf.                                           | 183634                |
|                                                        | 43 | cross sectional.ti,ab,kf.                                        | 554369                |
|                                                        | 44 | (follow up adj (study or studies)).ti,ab,kf.                     | 71168                 |
|                                                        | 45 | longitudinal.ti,ab,kf.                                           | 382874                |
|                                                        | 46 | retrospective.ti,ab,kf.                                          | 1039709               |
|                                                        | 47 | (prospective adj (study or studies)).ti,ab,kf.                   | 288690                |
|                                                        | 48 | (epidemiologic\$ adj (study or studies)).ti,ab,kf.               | 116243                |
|                                                        | 49 | or/29-48                                                         | 5276416               |
| Standard exclusion filter                              | 50 | exp animals/ not exp humans/                                     | 4860764               |
|                                                        | 51 | (comment or editorial or case reports or historical article).pt. | 708217                |
|                                                        | 52 | case report/ or editorial/                                       | 3355456               |
|                                                        | 53 | (case stud\$ or case report\$).ti.                               | 405562                |
|                                                        | 54 | or/50-53                                                         | 8305199               |
| Combination                                            | 55 | 10 and (28 or 49)                                                | 4447                  |
|                                                        | 56 | 55 not 54                                                        | 4048                  |
|                                                        | 57 | limit 56 to yr="2019-current"                                    | 4013                  |

**Databases:** Embase 1974 to 15 Nov., 2021.

**Abbreviations:** COVID-19, coronavirus disease 2019; RCT, randomised controlled/clinical trial.

**Table S4. Search terms used in the Cochrane Library databases (searched simultaneously via the Wiley platform)**

| Date searched: 16 Nov., 2021<br>Records retrieved: CENTRAL, 153; CDSR, 3 |    |                                                                                                                                                                                                                                                                                                                                                              |                       |
|--------------------------------------------------------------------------|----|--------------------------------------------------------------------------------------------------------------------------------------------------------------------------------------------------------------------------------------------------------------------------------------------------------------------------------------------------------------|-----------------------|
| Term group                                                               | #  | Search terms                                                                                                                                                                                                                                                                                                                                                 | Results 16 Nov., 2021 |
| Disease Area:<br>Long COVID-19                                           | 1  | [mh ^"coronavirus"] OR [mh ^"coronavirus infections"]                                                                                                                                                                                                                                                                                                        | 668                   |
|                                                                          | 2  | SARS-CoV-2:ti,ab,kw                                                                                                                                                                                                                                                                                                                                          | 315                   |
|                                                                          | 3  | (coronavirus* OR (corona NEXT virus*)):ti,ab,kw                                                                                                                                                                                                                                                                                                              | 4911                  |
|                                                                          | 4  | ("Covid-19" OR Covid19):ti,ab,kw                                                                                                                                                                                                                                                                                                                             | 7918                  |
|                                                                          | 5  | nCoV:ti,ab,kw                                                                                                                                                                                                                                                                                                                                                | 189                   |
|                                                                          | 6  | [12-#5]                                                                                                                                                                                                                                                                                                                                                      | 8364                  |
|                                                                          | 7  | ("long term" OR "long haul" OR "post acute" OR "long COVID" OR "post COVID" OR "chronic COVID"):ti,ab,kw                                                                                                                                                                                                                                                     | 104386                |
|                                                                          | 8  | #6 AND #7                                                                                                                                                                                                                                                                                                                                                    | 433                   |
|                                                                          | 9  | ((long OR longer OR hauler* OR post OR persistent OR persistence OR prolong* OR extend* OR protract* OR sequelae OR chronic) NEAR/2 (SARSCOVID OR SAR-CoV2 OR COVID OR COVID19 OR COVID-19 OR "Sars Covid" OR 2019nCoV OR 19ncov OR nCoV OR n-cov OR coronavirus OR SARS-CoV-2 OR sarscov2 OR sarsCov-2 OR sars-cov2 OR "novel Cov" OR "wuhan virus")):ti,ab | 218                   |
|                                                                          | 10 | #8 AND #9                                                                                                                                                                                                                                                                                                                                                    | 159                   |
|                                                                          | 11 | <b>#10 with publication date 2019-2021, in Trials</b>                                                                                                                                                                                                                                                                                                        | 153                   |
|                                                                          | 12 | <b>#10 with publication date 2019-2021, in Cochrane Reviews and Cochrane Protocols</b>                                                                                                                                                                                                                                                                       | 3                     |

**Databases:** Cochrane Central Register of Controlled Trials Issue 10 of 12, October 2021; Cochrane Database of Systematic Reviews Issue 10 of 12, October 2021.

**Abbreviations:** COVID-19, coronavirus disease 2019; CDSR, Cochrane Database of Systematic Reviews; CENTRAL, Cochrane Central Register of Controlled Trials.

**Table S5. Search terms used in WHO ICTRP**

| Term Group                      | Search Terms                                                                                                                                                                                                                                                                                                                                                                                 |
|---------------------------------|----------------------------------------------------------------------------------------------------------------------------------------------------------------------------------------------------------------------------------------------------------------------------------------------------------------------------------------------------------------------------------------------|
| <b>Title</b>                    | coronavirus infection OR covid-19 OR covid19 OR long-covid OR long covid OR post-covid OR post covid OR SARS-CoV-2 OR chronic covid OR long haul covid OR post-acute covid OR post acute covid OR post-discharge OR post discharge OR sequelae OR SARSCOV2 OR SAR-CoV2 OR COVID OR Sars Covid OR 2019ncov OR 19ncov OR ncov OR n-cov OR coronavirus OR sarsCov-2 OR novel Cov OR wuhan virus |
| <b>Condition</b>                | coronavirus infection OR covid-19 OR covid19 OR long covid OR post covid OR SARS-CoV-2 OR chronic covid OR long haul covid OR SARSCOV2 OR COVID OR Sars Covid OR 2019ncov OR ncov OR n-cov OR coronavirus OR sarsCov-2 OR sars-cov2 OR novel Cov                                                                                                                                             |
| <b>Intervention</b>             | Blank                                                                                                                                                                                                                                                                                                                                                                                        |
| <b>Recruitment Status</b>       | All                                                                                                                                                                                                                                                                                                                                                                                          |
| <b>Primary Sponsor</b>          | Blank                                                                                                                                                                                                                                                                                                                                                                                        |
| <b>Secondary ID</b>             | Blank                                                                                                                                                                                                                                                                                                                                                                                        |
| <b>Countries Of Recruitment</b> | Blank                                                                                                                                                                                                                                                                                                                                                                                        |
| <b>Date of Registration</b>     | 1 Jan., 2019 to 3 Dec., 2021                                                                                                                                                                                                                                                                                                                                                                 |
| <b>Phases</b>                   | Phase 2, Phase 3, Phase 4                                                                                                                                                                                                                                                                                                                                                                    |

**Platform:** <https://www.who.int/clinical-trials-registry-platform> on 3 Dec., 2021

**Abbreviations:** COVID-19, coronavirus disease 2019; ICTRP, International Clinical Trials Registry Platform; SARS-CoV-2, severe acute respiratory syndrome coronavirus 2; WHO, World Health Organization.

**Figure S1. Summary of study quality and risk of bias**

### Modified JBI Prevalence Checklist

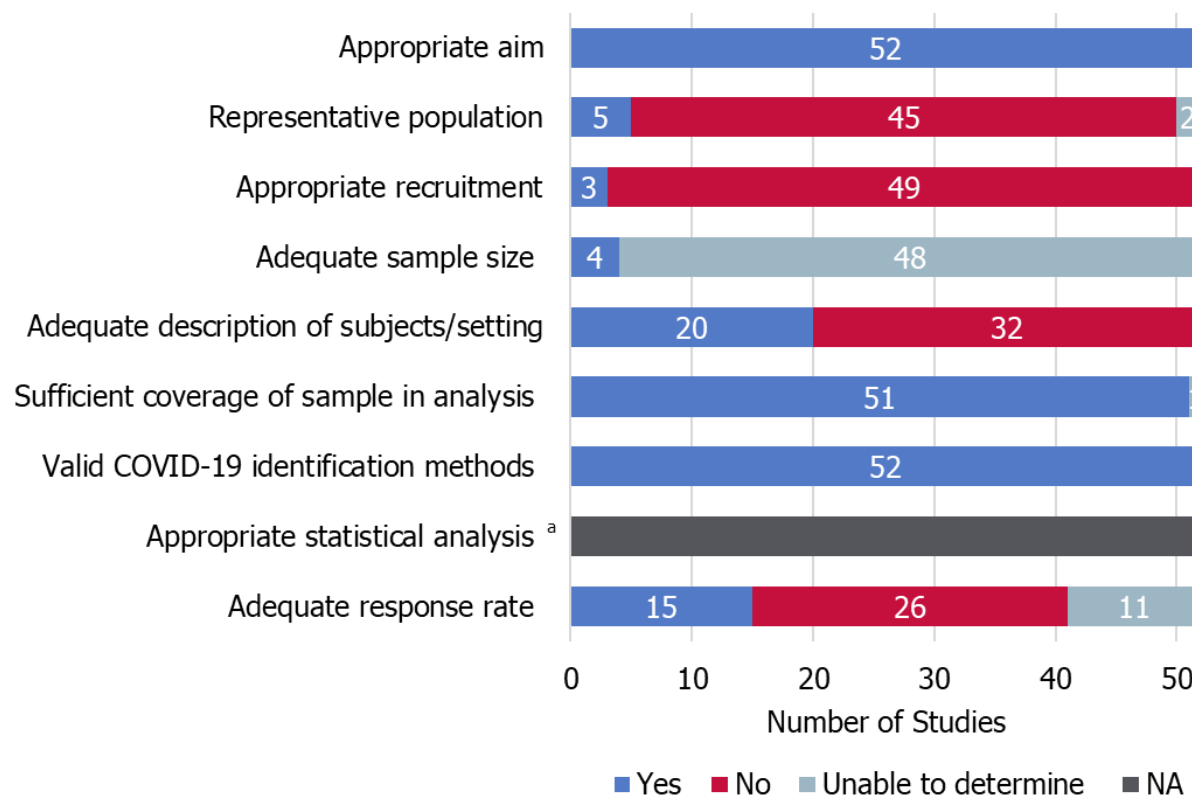

**Footnotes:** <sup>a</sup> Statistical analysis was not expected for outcomes of interest. All studies had appropriate aim and valid COVID-19 identification methods since these were inclusion criteria.

**Abbreviations:** COVID-19: coronavirus disease 2019; JBI: Joanna Briggs Institute.

**Figure S2a. Funnel plot assessing risk of publication bias for fatigue at the  $\geq 1$  to  $< 4$  months timepoint**

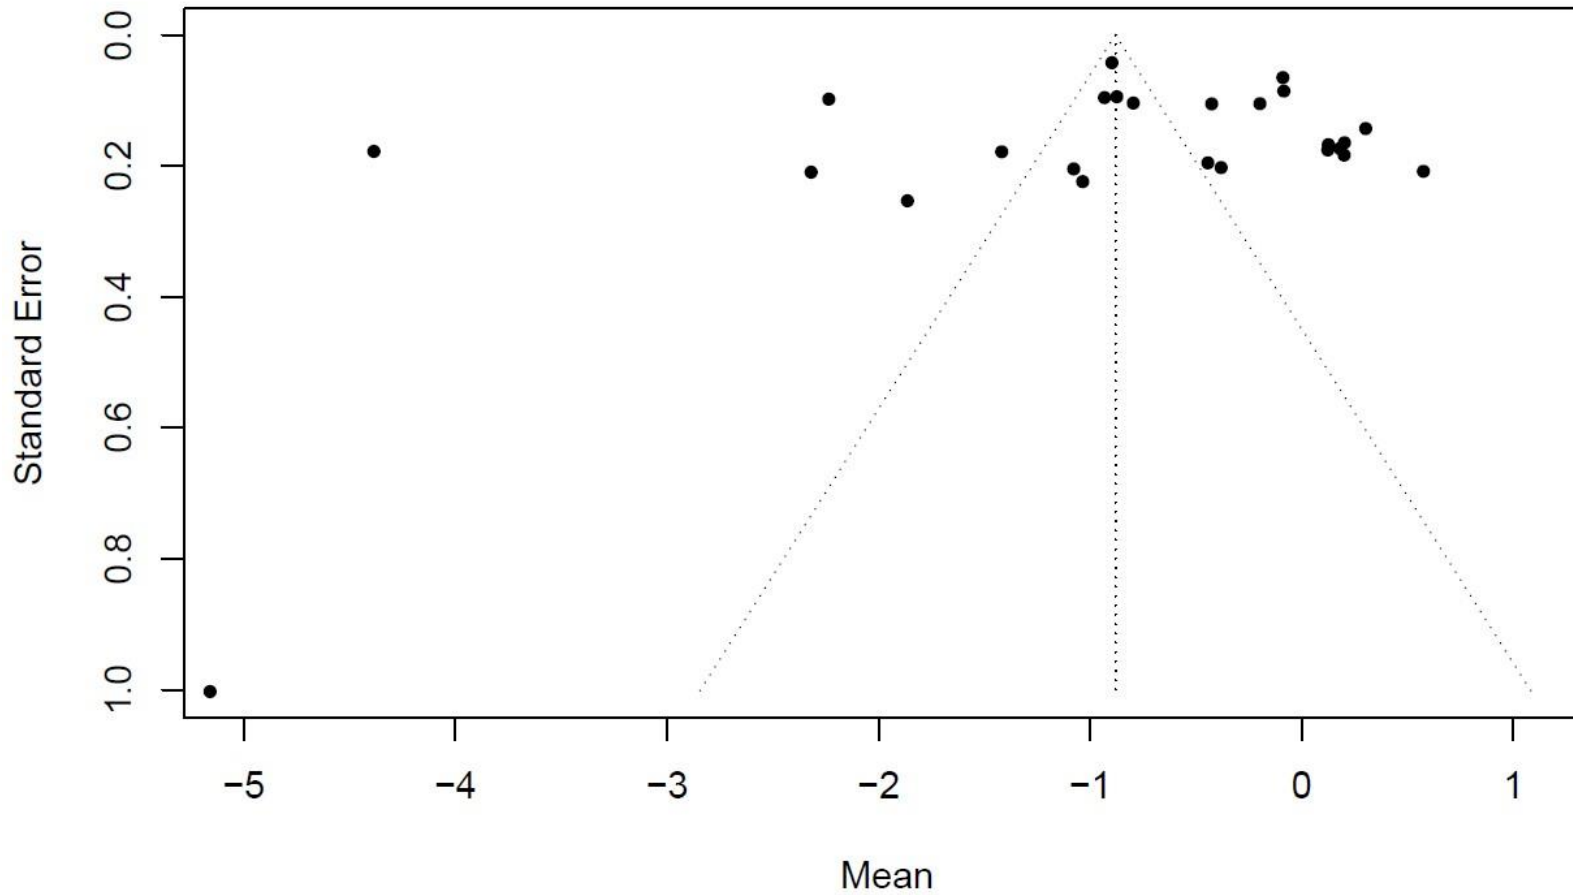

\*Egger's test:  $p=0.7761$



**Figure S2b. Funnel plot assessing risk of publication bias for diarrhoea at the  $\geq 4$  to  $< 8$  months timepoint**

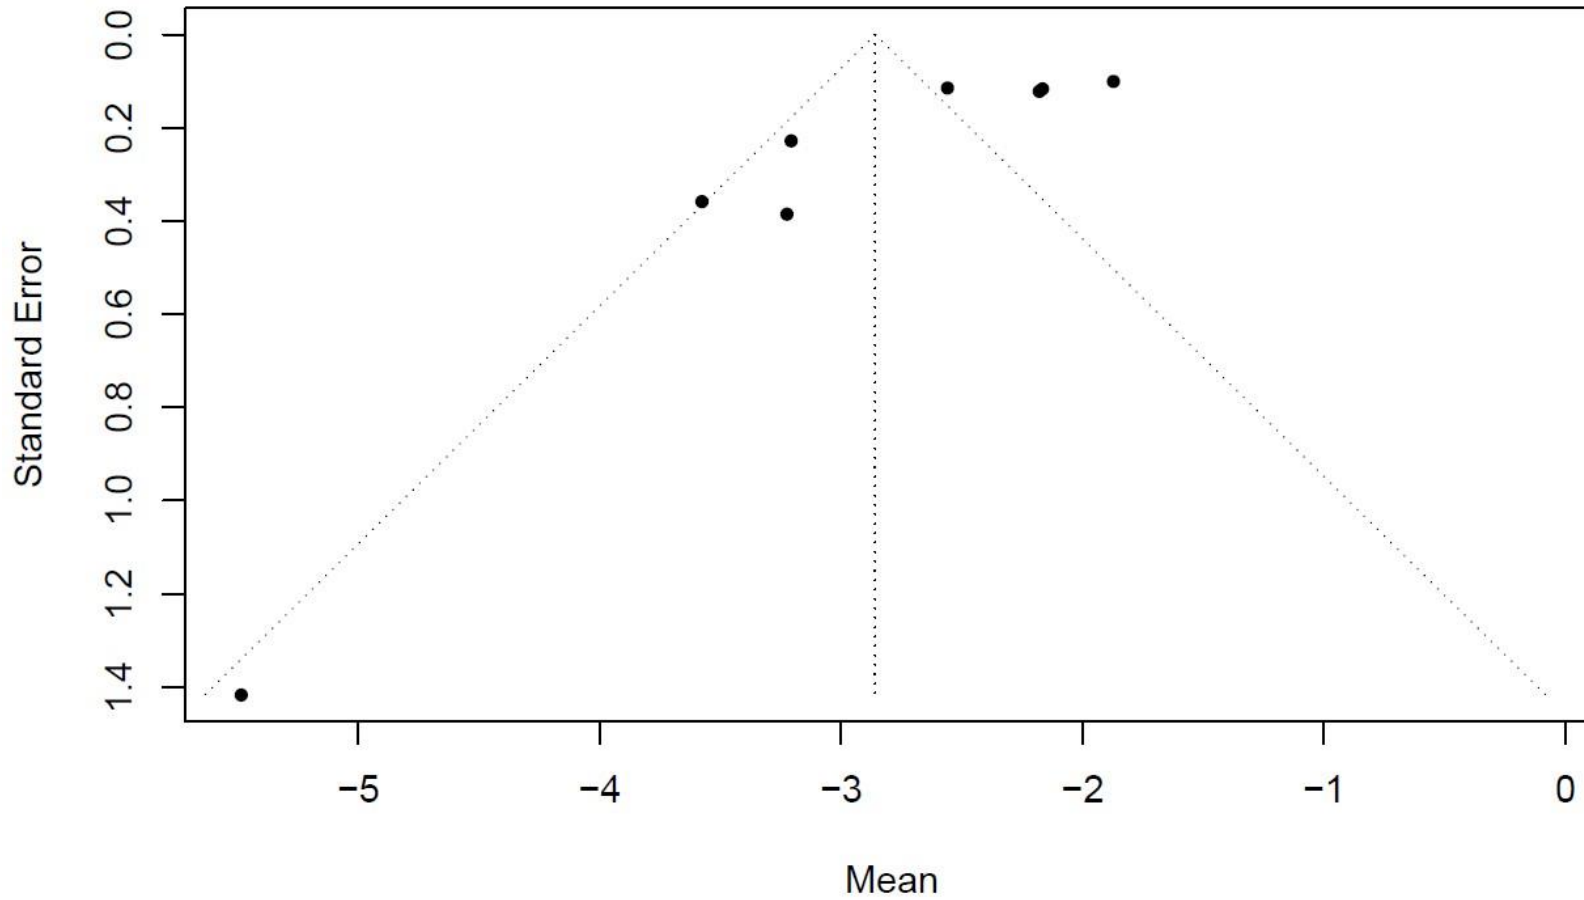

\*Egger's test:  $p=0.0242$
